# Supplementary material
Source: ML conference proceedings conference paper supplement (https://openreview.net/forum?id=HGjJkNH8Pu)
Supplement: supplementary_material [file attachment]

# Supplementary Materials: Let Me Finish My Sentence

Anonymous Authors

QUERY: A group of people stand around a table and take turns running their hands around the base of a mound of dirt on the table.

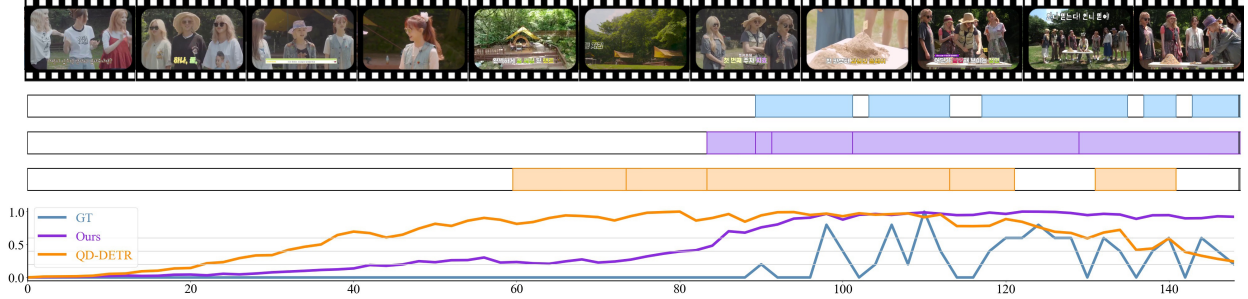

Figure 1: Comparative prediction results on the QVHighlights validation set for longer text queries, demonstrating our method’s superior handling of complex queries.

Table 1: Performance comparison on the QVHighlights validation split. The evaluation is segmented into ‘All’ for the entire validation set and ‘Long’ for queries exceeding 13 words.

| Set  | Method  | MR    |       | HD    |                |
|------|---------|-------|-------|-------|----------------|
|      |         | R1    |       | mAP   |                |
|      |         | @0.5  | @0.7  | Avg.  | ≥Very Good mAP |
| All  | QD-DETR | 62.84 | 46.77 | 41.23 | 39.49          |
| All  | Ours    | 67.61 | 50.65 | 44.80 | 40.98          |
| Long | QD-DETR | 58.44 | 39.94 | 38.40 | 38.84          |
| Long | Ours    | 66.23 | 47.40 | 43.65 | 40.36          |

## 1 ROBUSTNESS TO QUERY LENGTH

Utilizing global text understanding, our method effectively predicts relevant frames even with longer text queries. To demonstrate its robustness, we evaluated it on queries exceeding 13 words, constituting 308 out of 1550 samples in the QVHighlights validation split. Results presented in Table 1 and Figure 1 show strong performance on extended queries. Notably, our model surpasses QD-DETR with a 4.77% improvement in R1@0.5 and a 3.57% increase in average mAP for the ‘All’ category. This margin expands to 7.79% in R1@0.5 and 5.25% in average mAP for the ‘Long’ category, highlighting our method’s robustness across varying query lengths.

## 2 ADDITIONAL ABLATION STUDIES

**Number of layers.** We explore various configurations of layer counts within our architecture to understand their impact on performance. The configuration with 2 cross-modal interaction layers, 3 encoder layers, and 3 decoder layers ( $C = 2, E = 3, D = 3$ ) yields the best results.

**Fine-Grained Alignment Loss.** We explore the impact of varying the weights for fine-grained alignment loss, specifically the weights  $\lambda_{clip}$  and  $\lambda_{frame}$ . The results indicate that a balanced adjustment of

Table 2: Ablation results for different configurations of cross-modal interaction (C), transformer encoder (E), and decoder (D) layers on the QVHighlights validation set.

| C | E | D | MR    |       | HD       |                |
|---|---|---|-------|-------|----------|----------------|
|   |   |   | R1    |       | mAP Avg. |                |
|   |   |   | @0.5  | @0.7  |          | ≥Very Good mAP |
| 2 | 2 | 2 | 66.45 | 49.55 | 43.28    | 40.65          |
| 2 | 3 | 3 | 67.61 | 50.65 | 44.80    | 40.98          |
| 3 | 2 | 2 | 67.03 | 49.10 | 43.41    | 40.87          |
| 3 | 3 | 3 | 64.58 | 48.71 | 43.70    | 40.33          |

Table 3: Ablation study results evaluating the impact of fine-grained alignment loss weights,  $\lambda_{clip}$  and  $\lambda_{frame}$  on the QVHighlights validation split.

| $\lambda_{clip}$ | $\lambda_{frame}$ | MR    |       | HD    |                |
|------------------|-------------------|-------|-------|-------|----------------|
|                  |                   | R1    |       | mAP   |                |
|                  |                   | @0.5  | @0.7  | Avg.  | ≥Very Good mAP |
| 0.0              | 0.0               | 62.65 | 47.81 | 42.39 | 39.31          |
| 0.5              | 0.5               | 67.55 | 50.97 | 45.06 | 40.88          |
| 0.5              | 1.0               | 67.23 | 50.39 | 44.64 | 40.68          |
| 1.0              | 0.5               | 66.52 | 50.65 | 44.81 | 40.46          |
| 1.0              | 1.0               | 67.61 | 50.65 | 44.80 | 40.98          |

these weights does not significantly alter performance. Therefore, we opt for a weight configuration of  $\lambda_{clip} = 1.0$  and  $\lambda_{frame} = 1.0$ , which consistently delivers optimal results.

## 3 FURTHER QUALITATIVE RESULTS

Figure 2 presents additional qualitative comparisons with our baseline, QD-DETR, highlighting the enhanced accuracy and context sensitivity of our approach.

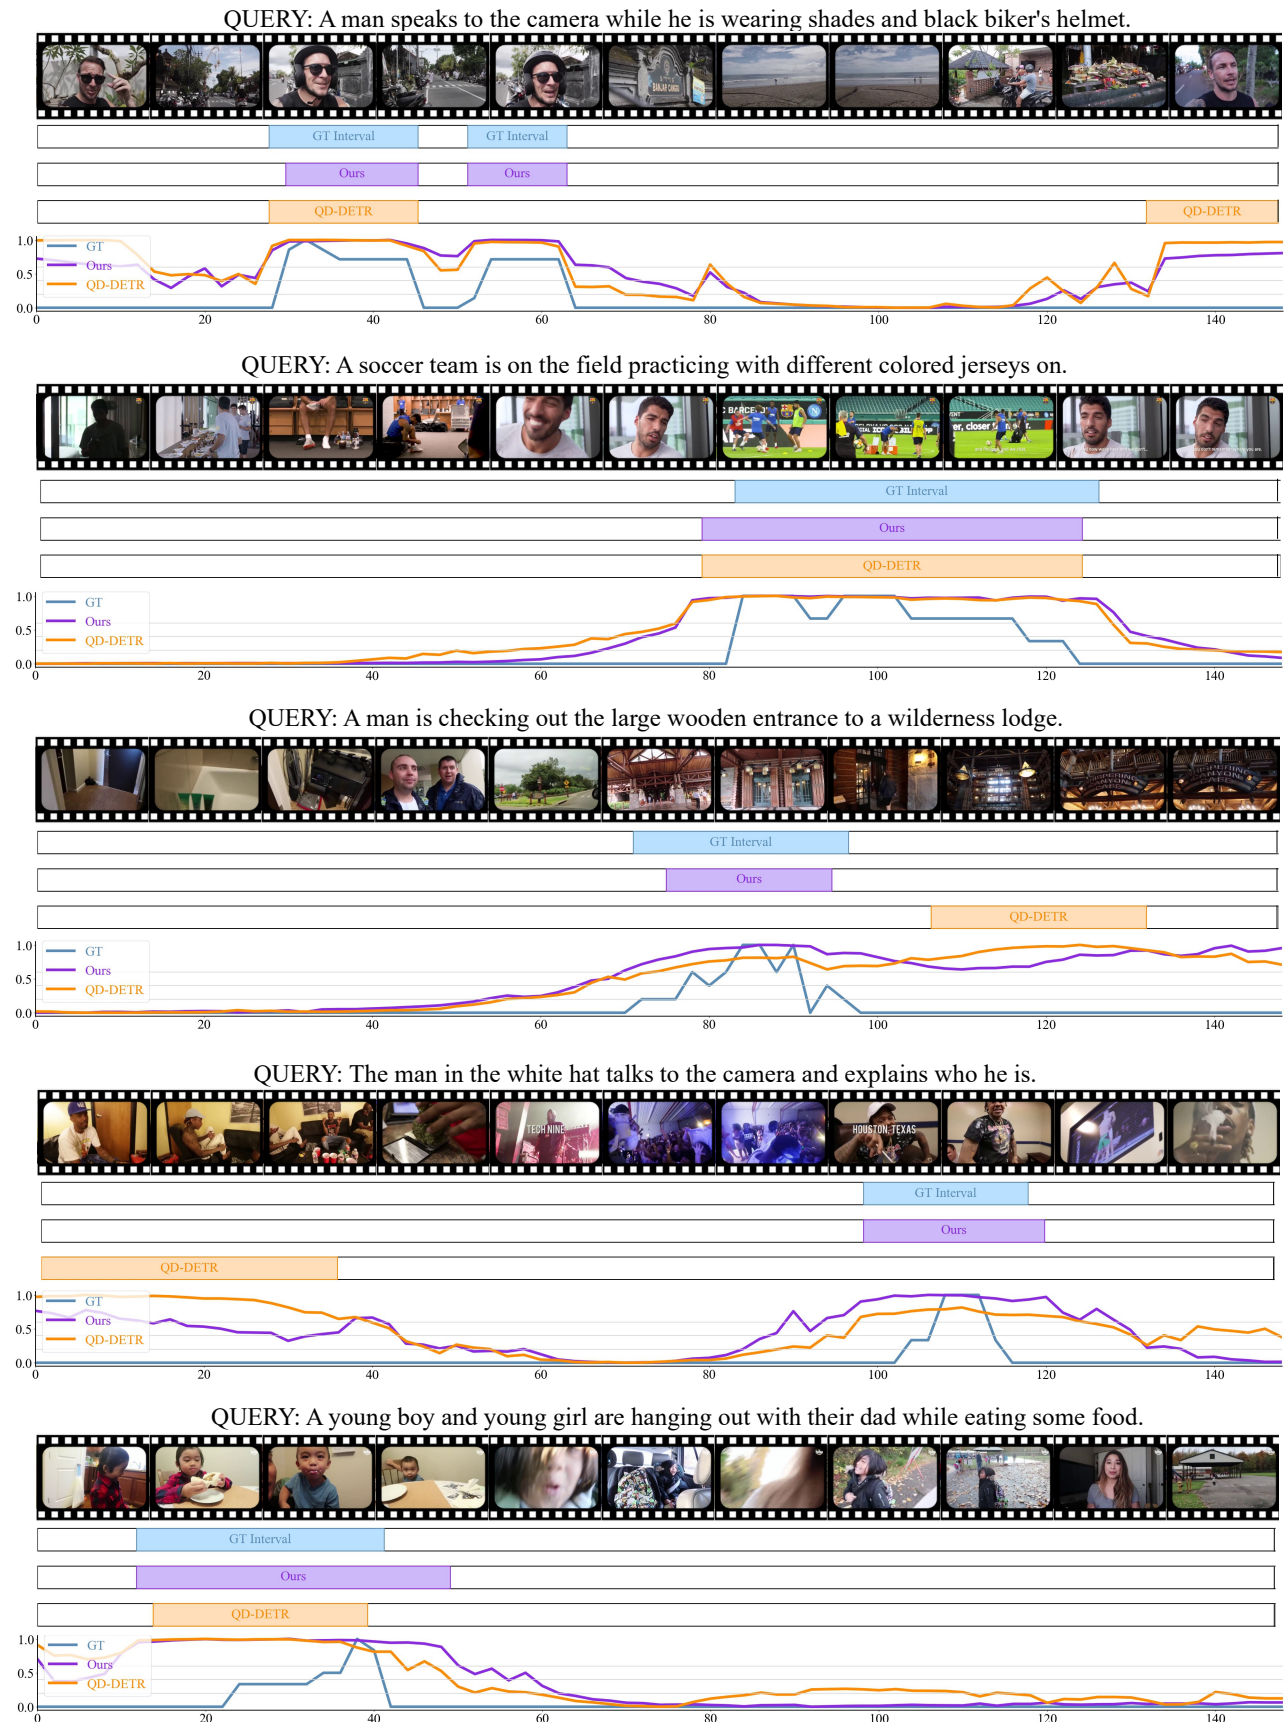

Figure 2: Extended qualitative results on the QVHighlights validation split, showcasing our method's effectiveness in comparison to the baseline, QD-DETR. Displayed from top to bottom are the text queries, along with the corresponding predictions of moments and highlights for each method.
